# Supplementary material
Source: HighWire-hosted journal article supplement (https://www.annfammed.org/content/suppl/2004/10/04/2.5.481)
Supplement: Jerant_Suppl_Fig.pdf [file Jerant_Suppl_Fig.pdf]

Online Supplementary Material

Jerant AF, Franks P, Jackson JE, Doescher MP. Age-related disparities in cancer screening: analysis of 2001 behavioral risk factor surveillance system data. *Ann Fam Med.* 2004;2:481-487.

<http://www.annfammed.org/cgi/content/full/2/4/481/DC1>

**Supplemental Figure. Adjusted predicted cancer screening, by age-group and sex.**

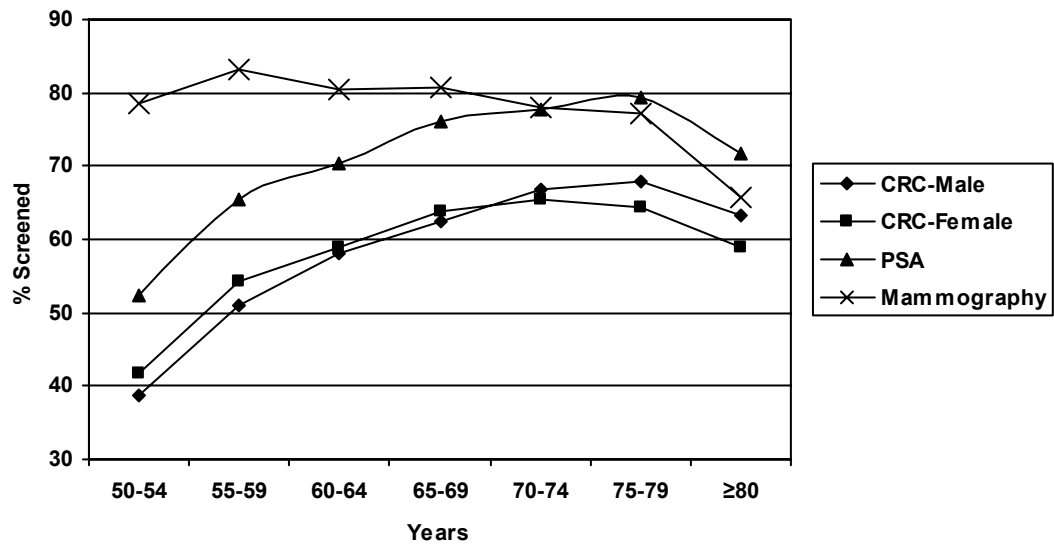

CRC = colorectal cancer screening; PSA = prostate-specific antigen testing.
